# Supplementary material for: Flavonolignans Inhibit IL1-β-Induced Cross-Talk between Blood Platelets and Leukocytes
Source: MDPI journal article supplement (doi:10.3390/nu9091022), 2017-09-15
Supplement: s1 [file s1]

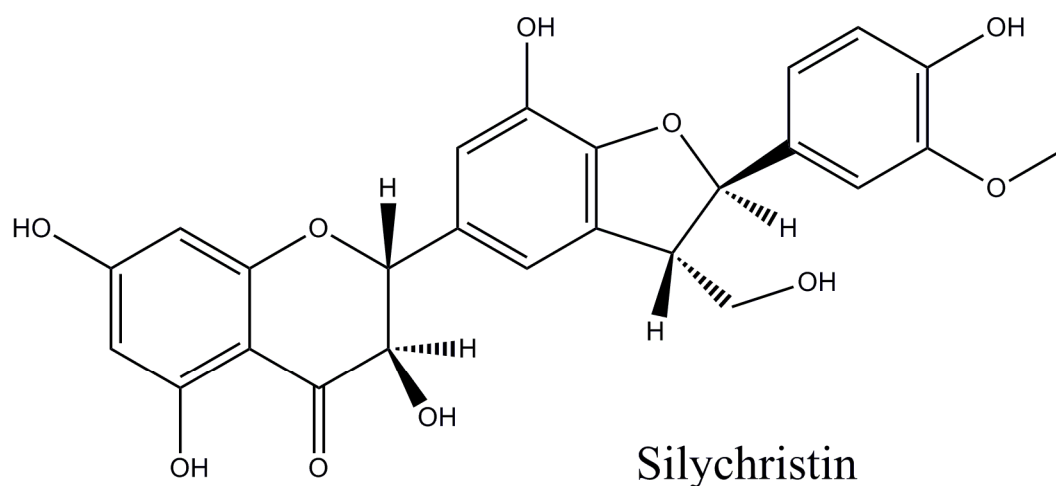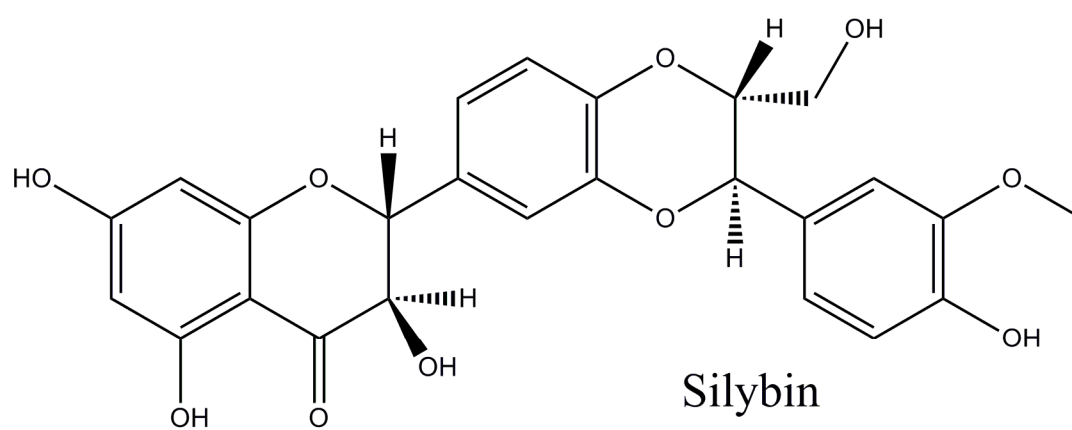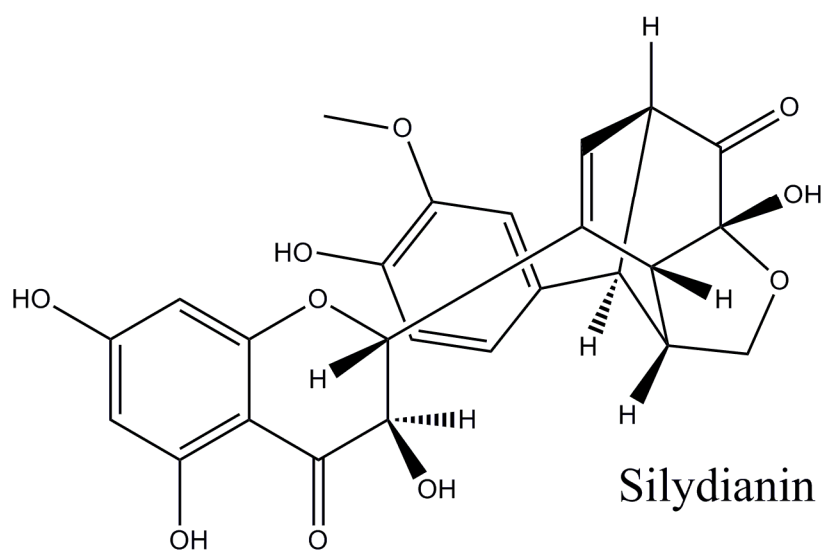

Figure S1: Chemical structures of flavonolignans used in this study

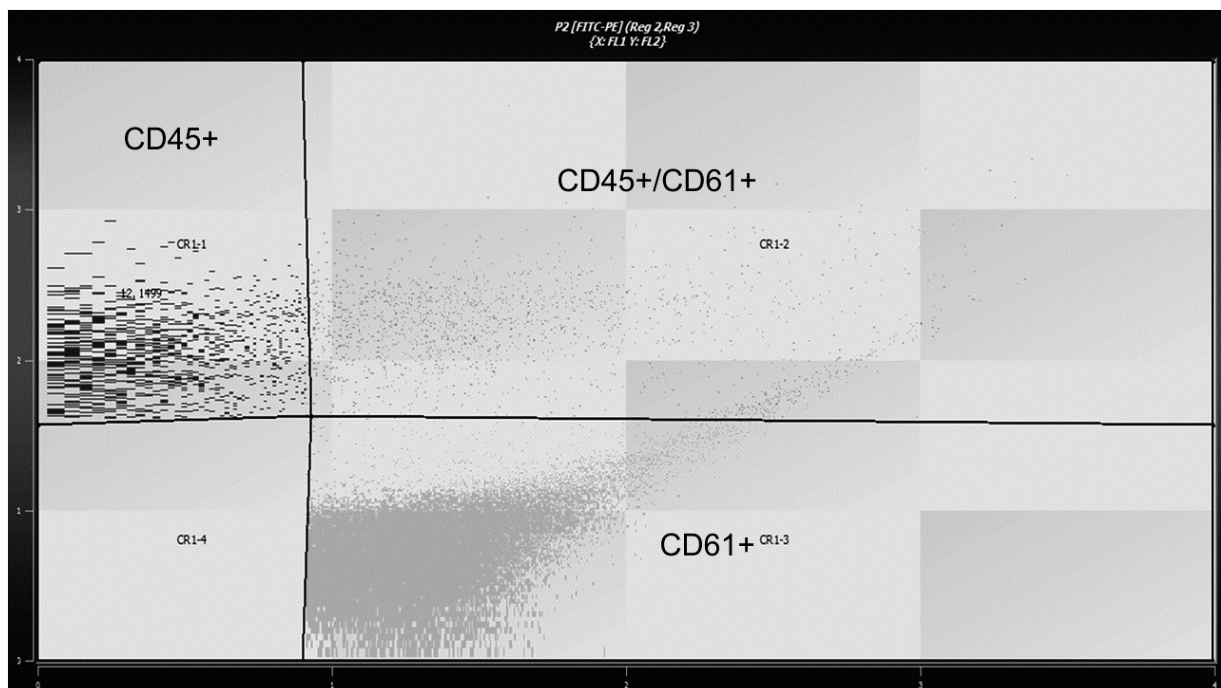

Figure S2: Flow cytometry dot plot presented blood platelet-leukocyte aggregates
